# Supplementary material
Source: publisher site journal article supplement (https://alpineentomology.pensoft.net/article/64803/download/suppl/32/)
Supplement: Supplementary file 1

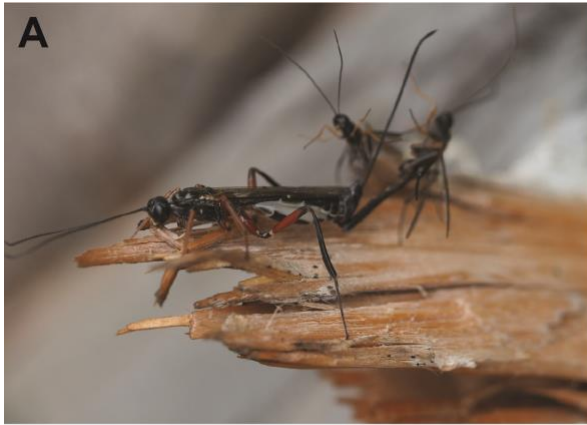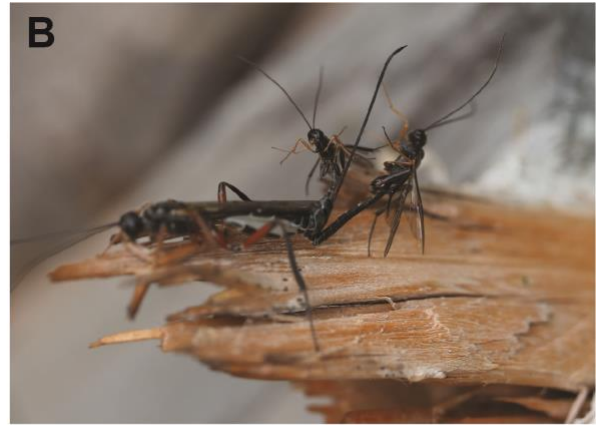

**S.Fig 1:** *Xorides ater* mating behaviour **A** Adult female (left) in copula with two attached males (right). Only female is in focus; **B** Adult female (left) in copula with two attached males (right). Only males are in focus. These two raw images have been stacked together and edited to generate the composite image Fig. 2A.
